# Supplementary material for: Cis- and Trans-Regulatory Variations in the Domestication of the Chili Pepper Fruit
Source: PubMed Central journal article supplement (PMC7253206; doi:10.1093/molbev/msaa027), 2020-02-07
Supplement: msaa027_supplementary_data.pdf [file msaa027_supplementary_data.pdf]

## Supplementary Tables

**Table S1.** Overview of transcriptome analysis via Illumina Hi-seq 4000 sequencing

|                                                           | Cultivated Parent |       |                    | F1 Hybrid |       |                    | Wild Parent |       |                    |
|-----------------------------------------------------------|-------------------|-------|--------------------|-----------|-------|--------------------|-------------|-------|--------------------|
|                                                           | C_1               | C_2   | C_3                | CxW_1     | CxW_2 | CxW_3              | W_1         | W_2   | W_3                |
| Total PE reads (millions) <sup>a</sup>                    | 30.24             | 28.93 | 33.63              | 24.17     | 24.45 | 29.60              | 30.87       | 24.55 | 27.43              |
| Filtered reads (millions)                                 | 14.13             | 11.43 | 15.68              | 13.11     | 11.15 | 11.48              | 14.13       | 11.43 | 12.70              |
| Mapped reads (millions)                                   | 10.04             | 9.82  | 11.91              | 9.52      | 6.76  | 8.33               | 9.90        | 7.62  | 9.26               |
| Number of expressed transcripts (percentage) <sup>b</sup> |                   |       | 20,456<br>(58.61%) |           |       | 20,053<br>(57.46%) |             |       | 19,702<br>(56.45%) |

<sup>a</sup>Parental and hybrid results are total number of raw pair-end (PE) reads, regardless of allele specificity.

<sup>b</sup>Transcripts with at least 5 read counts in at least 47% of the samples. Percentage values reflect the portion of the whole transcriptome expressed in each RNA-seq library, considering 34,899 predicted transcripts.

**Table S2.** Details about the Allele-Specific SNPs in F1 hybrid libraries.

|                                                                                                                                              | Vs Cultivated Pseudo-reference |        |        | Vs Wild Pseudo-reference |        |        |
|----------------------------------------------------------------------------------------------------------------------------------------------|--------------------------------|--------|--------|--------------------------|--------|--------|
|                                                                                                                                              | CxW_1                          | CxW_1  | CxW_1  | CxW_1                    | CxW_1  | CxW_1  |
| Number of raw heterozygous SNPs <sup>a</sup>                                                                                                 | 54,910                         | 39,401 | 59,494 | 34,237                   | 24,134 | 36,394 |
| Shared SNPs between libraries                                                                                                                |                                |        | 17,138 |                          |        | 29,079 |
| SNPs with reciprocal genotypes <sup>b</sup>                                                                                                  |                                |        |        |                          |        | 10,404 |
| Number of transcripts bearing parental-specific alleles                                                                                      |                                |        |        |                          |        | 5,077  |
| Number of diagnostic SNPs per transcript (mean)                                                                                              |                                |        |        |                          |        | 2.03   |
| <sup>a</sup> Filtered SNPs with at least 10 reads supporting the polymorphism                                                                |                                |        |        |                          |        |        |
| <sup>b</sup> Heterozygous SNPs that retrieve reciprocal genotypes when F1 hybrid reads are mapped against each of the two pseudo-references. |                                |        |        |                          |        |        |

**Table S3.** Gene ontology terms with significant ( $p \leq 0.1$ ) enrichment for the trans-only gene set.

| GO ID      | Description                                    |
|------------|------------------------------------------------|
| GO:0003006 | developmental process involved in reproduction |
| GO:0007275 | multicellular organism development             |
| GO:0009790 | embryo development                             |
| GO:0009791 | post-embryonic development                     |
| GO:0009793 | embryo development ending in seed dormancy     |
| GO:0010154 | fruit development                              |
| GO:0022414 | reproductive process                           |
| GO:0032501 | multicellular organismal process               |
| GO:0032502 | developmental process                          |
| GO:0048316 | seed development                               |
| GO:0048608 | reproductive structure development             |

## Supplementary Figures

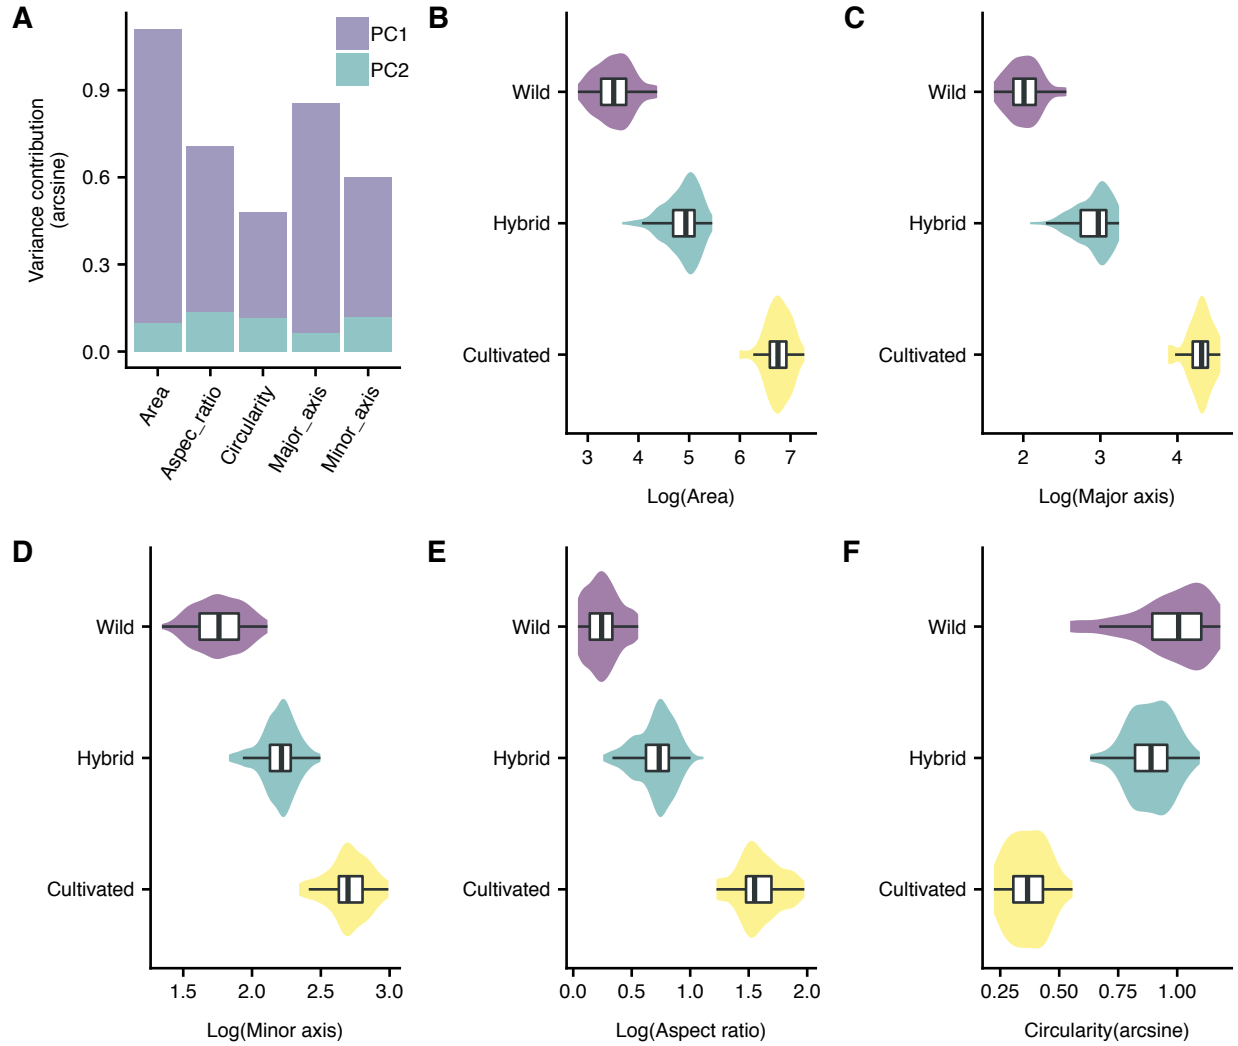

**Figure S1.** Morphometric analysis of fruit shape and size descriptors. A) Stacked bar plot showing the variance contributions of each morphometric descriptor to the principal components one and two. The variance contribution was arcsine-transformed for visualization purposes. B-F) Violin plots of individual phenotypic traits across the three genotypes.

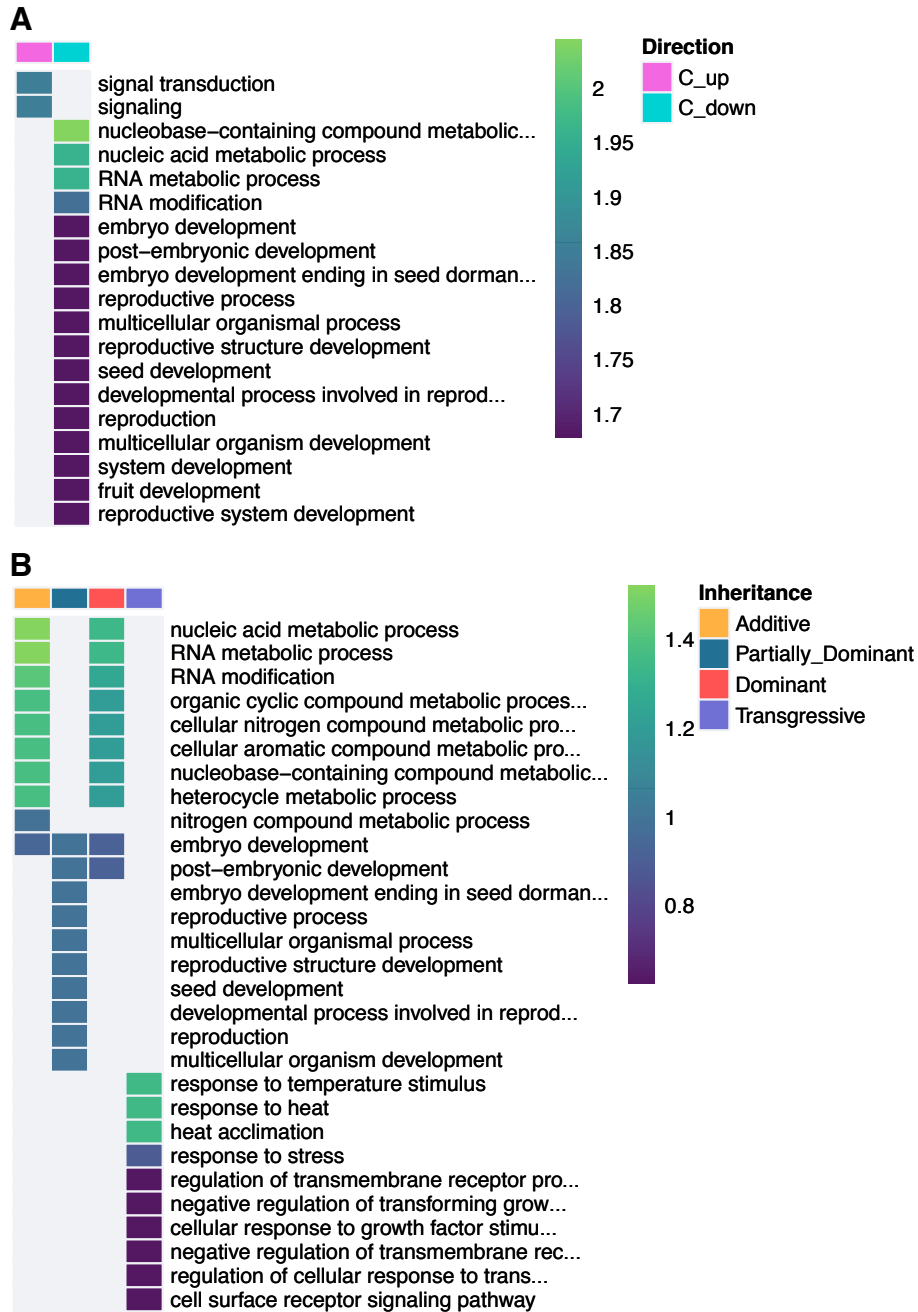

**Figure S2.** Heatmap of enriched gene ontology categories (biological processes) showing: A) The up- and down-regulation of the cultivated allele in  $F_0$ , and B) GO terms according to the mode of gene action (k).

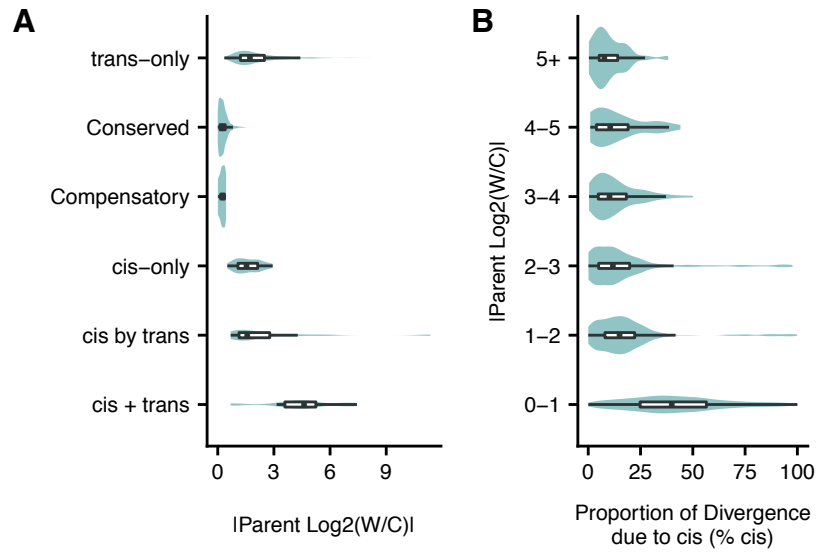

**Figure S3.** Features of *cis* and *trans*-regulated genes. A) Distribution of the effect sizes among parents for genes throughout all the categories of regulatory divergence. Genes with *cis+trans* produce the largest expression difference between parents. B) Proportion of divergence due to *cis* (% *cis*) in six different bins of expression divergence between parents, showing that genes have the least difference between parents also have the largest % *cis*.

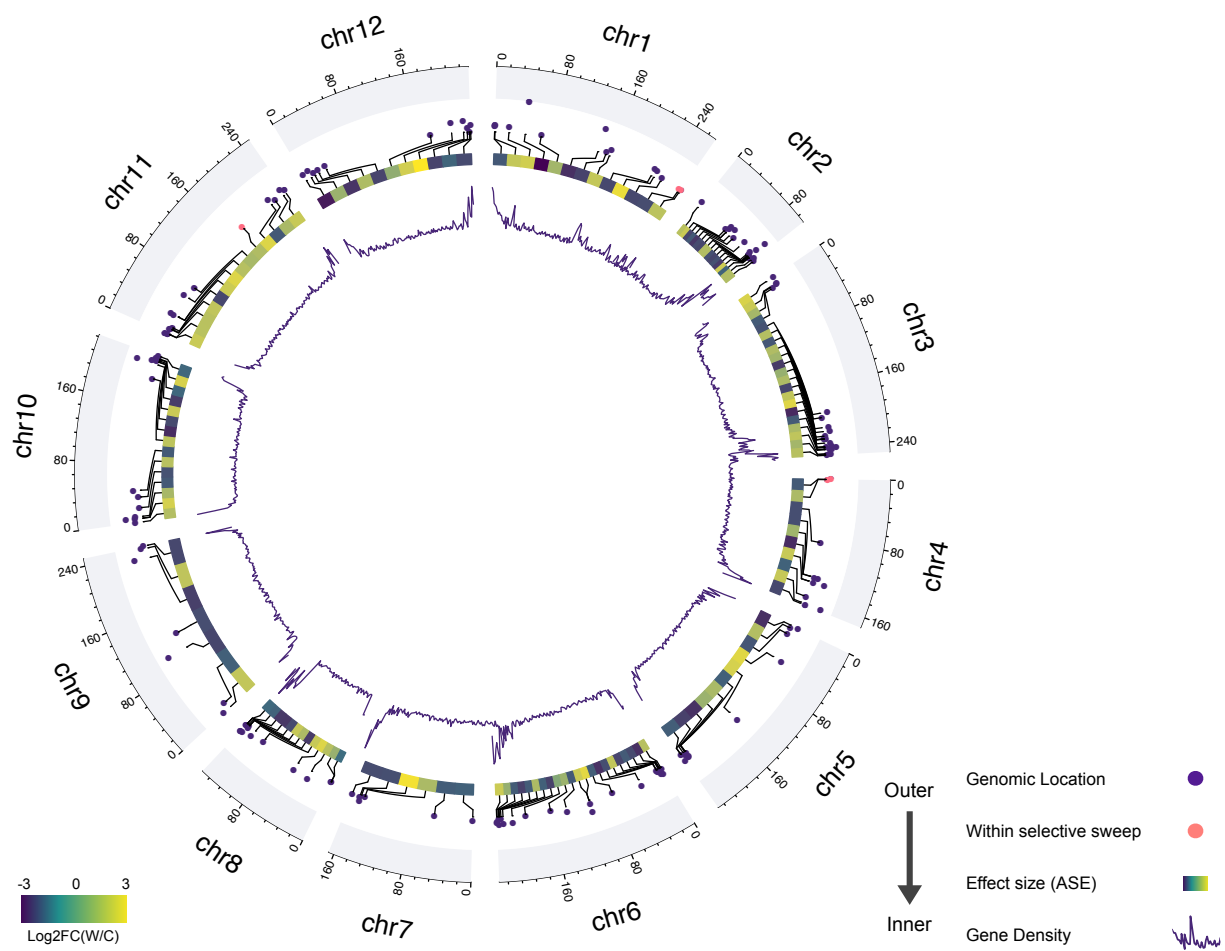

**Figure S4.** Circular representation of the twelve chili pepper chromosomes showing attributes of genes with *cis*-regulatory variation. The outermost track depicts the length of each chromosome in a Mb scale. The next track shows the genomic location and the  $-\text{LogFDR}$  of genes with significant ASE. Next, the effect size ( $\text{Log}_2$  fold change) of differential expression between the wild and the cultivated allele  $F_0$  is shown as a heatmap. The innermost track represents gene density as RNA-seq coverage in 2-Mb windows.

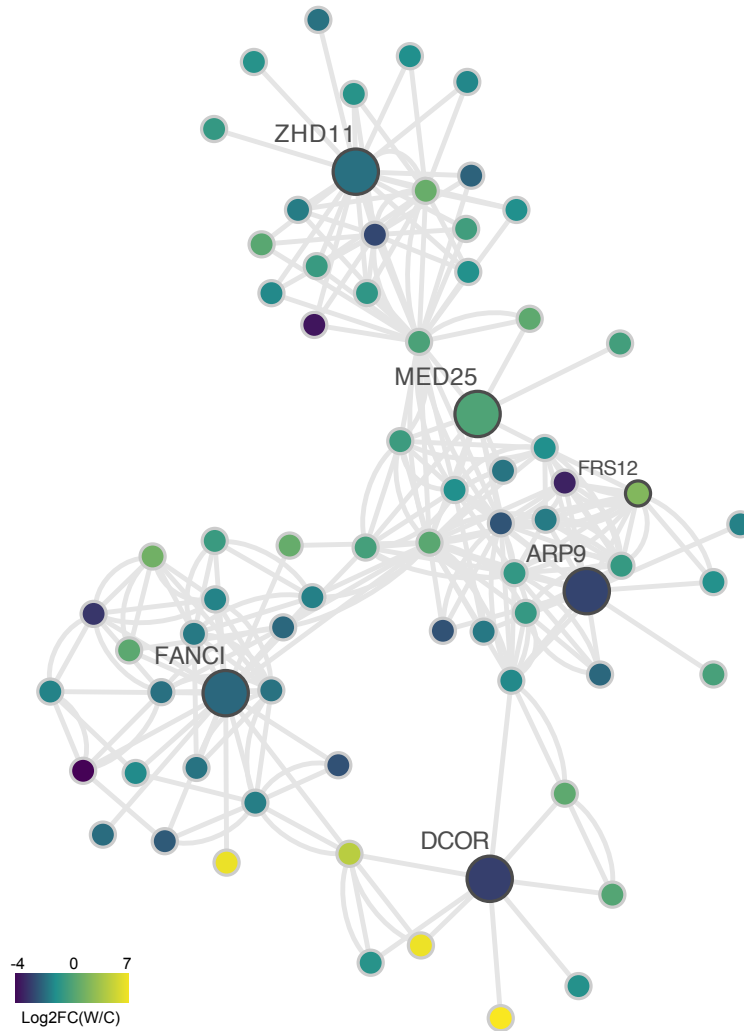

**Figure S5.** AracNe-based co-expression network representing putative interaction among the *cis* only candidates. The network was built by merging the individual networks of ZHD11, MED25, ARP9, DCOR FANCI and the FRS12 transcription factor. Color of nodes represent the Log<sub>2</sub> fold change (W/C) in F<sub>0</sub> generation. The length of the edges represents the strength of the co-expression.
